# Supplementary material
Source: PubMed Central journal article supplement (PMC6591131)
Supplement: EMS83427-supplement-Supp_Text.pdf [file EMS83427-supplement-Supp_Text.pdf]

In the format provided by the authors and unedited.

# Comprehensive identification of RNA-protein interactions in any organism using orthogonal organic phase separation (OOPS)

Rayner M. L. Queiroz<sup>1,5</sup>, Tom Smith<sup>1,5</sup>, Eneko Villanueva<sup>1,5\*</sup>, Maria Marti-Solano<sup>2</sup>, Mie Monti<sup>1</sup>, Mariavittoria Pizzinga<sup>3</sup>, Dan-Mircea Mirea<sup>1</sup>, Manasa Ramakrishna<sup>3</sup>, Robert F. Harvey<sup>3</sup>, Veronica Dezi<sup>3</sup>, Gavin H. Thomas<sup>4</sup>, Anne E. Willis<sup>3</sup> and Kathryn S. Lilley<sup>1\*</sup>

---

<sup>1</sup>Cambridge Centre for Proteomics, Department of Biochemistry, University of Cambridge, Cambridge, UK. <sup>2</sup>MRC Laboratory of Molecular Biology, Cambridge, UK. <sup>3</sup>MRC Toxicology Unit, University of Cambridge, Leicester, UK. <sup>4</sup>Department of Biology, University of York, York, UK. <sup>5</sup>These authors contributed equally: Rayner M. L. Queiroz, Tom Smith, Eneko Villanueva. \*e-mail: [ev318@cam.ac.uk](mailto:ev318@cam.ac.uk); [k.s.lilley@bioc.cam.ac.uk](mailto:k.s.lilley@bioc.cam.ac.uk)

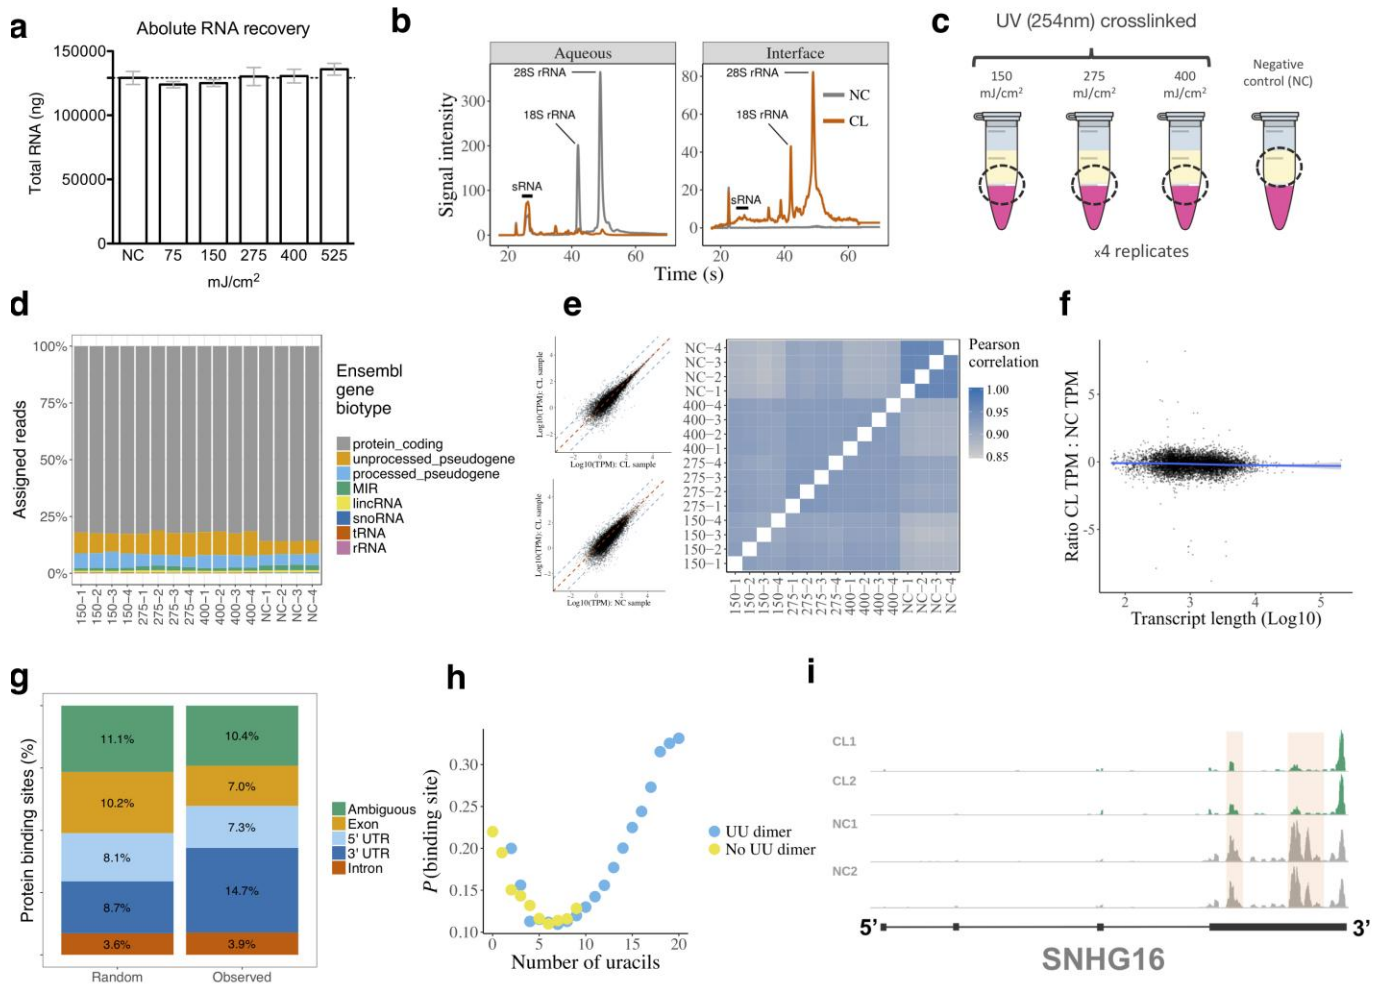

## Supplementary Figure 1

OOPS unbiasedly recovers all PBR species.

- (a) Absolute quantification of the total recovered RNA (PBR + Free RNA). Data shown as mean  $\pm$  SD of 3 independent experiments
- (b) Representative Bioanalyzer representation of the RNAs size-profile obtained from the aqueous and interfaces. Red: CL (400mJ/cm<sup>2</sup>). Grey: NC
- (c) Graphical representation of the RNA-origin analysed by RNA-seq
- (d) Relative proportions of reads assigned to Ensembl gene biotypes for all analysed samples
- (e) Correlation between two CL replicates (upper left panel) and a NC and 400 mJ/cm<sup>2</sup> CL replicate (upper left panel), blue dashed line represents a 10-fold difference. Pearson correlation of all analysed samples with NC (right)
- (f) Correlation between the ratio of CL/NC RNA in the interface and the length of the transcript
- (g) Percentage of windows deemed to be a site of protein binding. Windows split according to the mRNA feature type they overlap. Windows overlapping two none-intronic features classified as ambiguous. Random: random selection of the same number of windows, with the same distribution of read depths to obtain a null expectation based on read depth alone.
- (h) Relationship between uridine content in a window and the probability of the window being deemed to contain a protein binding site
- (i) Read coverage across SNHG16 for CL (400 mJ/cm<sup>2</sup>) and NC replicates. Red boxes denote regions with consistently reduced coverage in CL.

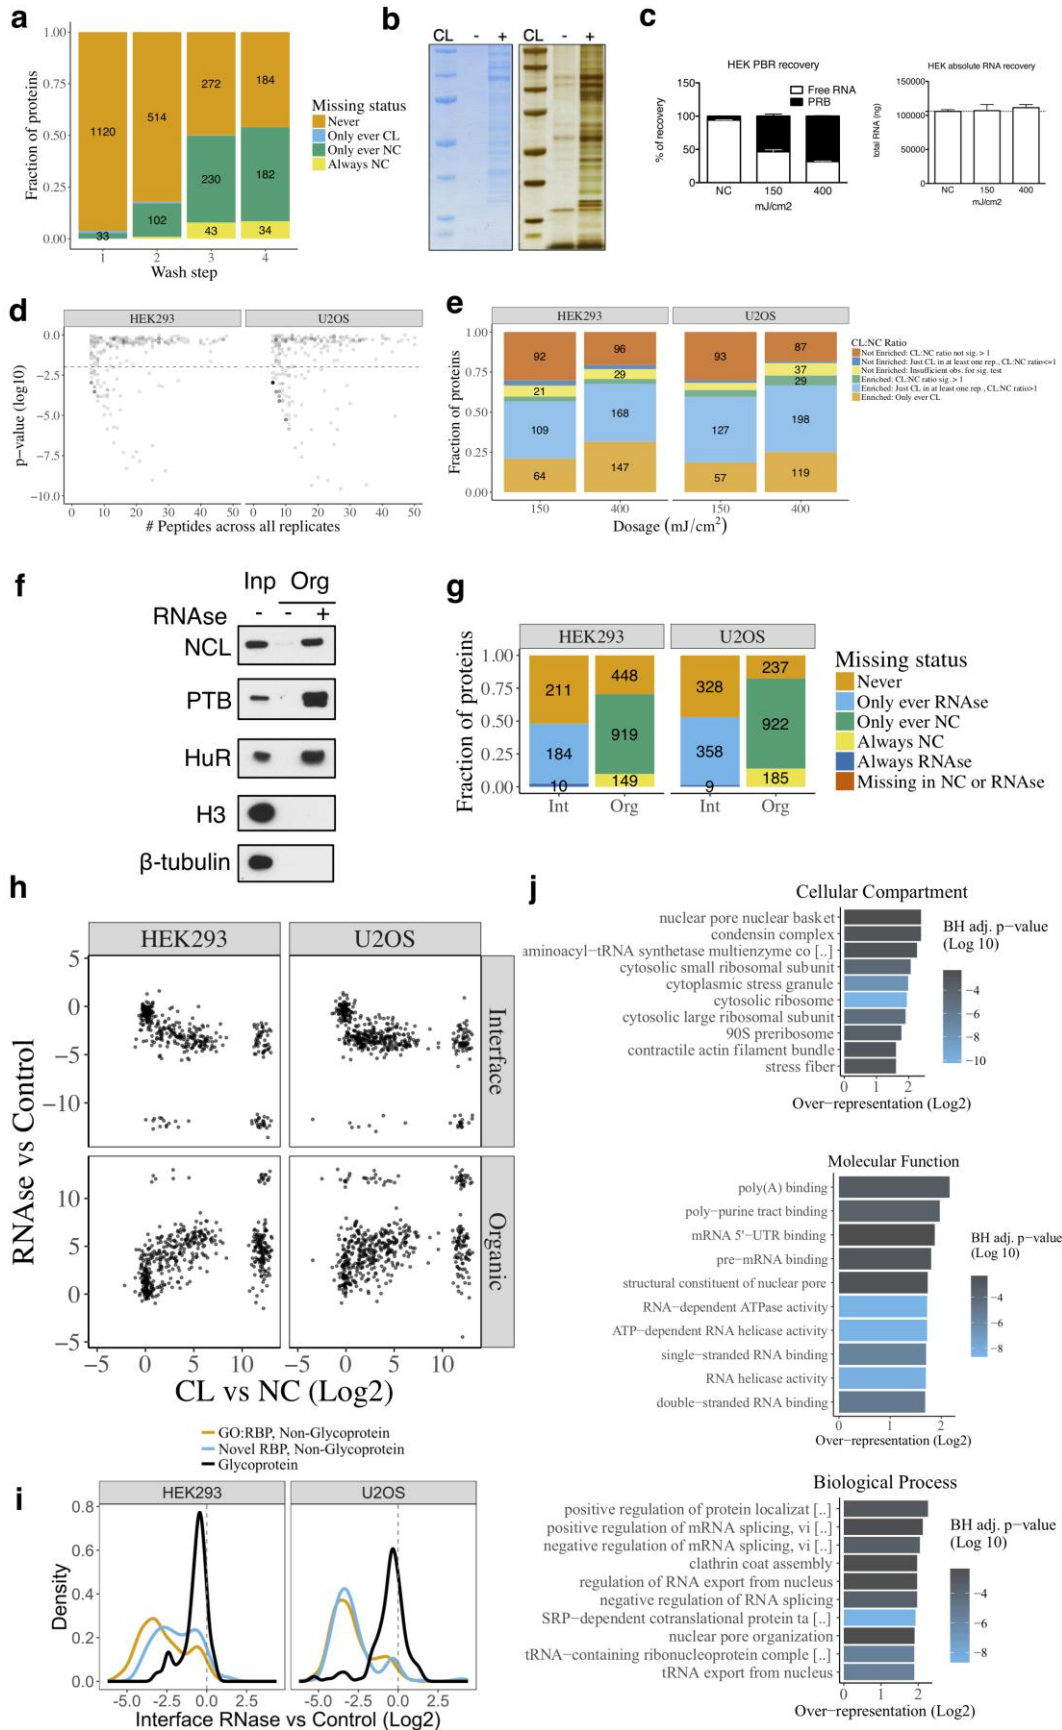

## Supplementary Figure 2

OOPS specifically recovers RBPs.

- (a) The proportion of proteins missing in at least one CL replicate, at least one NC replicate, always missing in NC replicates or never missing in any sample
- (b) Representative image of an acrylamide gel showing the interface protein content of a NC and CL samples. Left: coomassie-blue staining. Right: silver staining
- (c) Crosslinking efficacy in HEK-293. Left panel: Relative proportions of free RNA (aqueous phase) and protein-bound RNA (RBR; interface) with increasing UV dosage. Right panel: Absolute quantification of the total recovered RNA (PBR + Free RNA). Data shown as mean +/- SD of 3 independent experiments
- (d) Relationship between the number of peptides observed for a protein across all replicates and the p-value for CL-enrichment. Many proteins have insufficiently small p-value to pass 1% FDR threshold (dashed line) because of a lack of statistical power with few observations
- (e) Classification of proteins as enriched or depleted in CL vs NC experiment
- (f) Representative western blots for canonical RBPs (NCL (Nucleolin), PTB and HuR) and negative control proteins (H3 (Histone-H3) and  $\beta$ -tubulin)
- (g) The proportion of proteins which were missing in at least one RNAse replicate, at least one control replicate, always missing in the RNAse or control replicates or never missing. Int: Interface. Org: Organic
- (h) Protein CL vs NC ratio and RNAse vs control ratio in the 3rd interface and 4th organic phases
- (i) RNAse vs control ratio in the 3rd interface for GO annotated RBPs, other OOPS RBPs and glycoproteins
- (j) GO terms over-represented in the proteins that migrate to the organic phase upon RNAse treatment

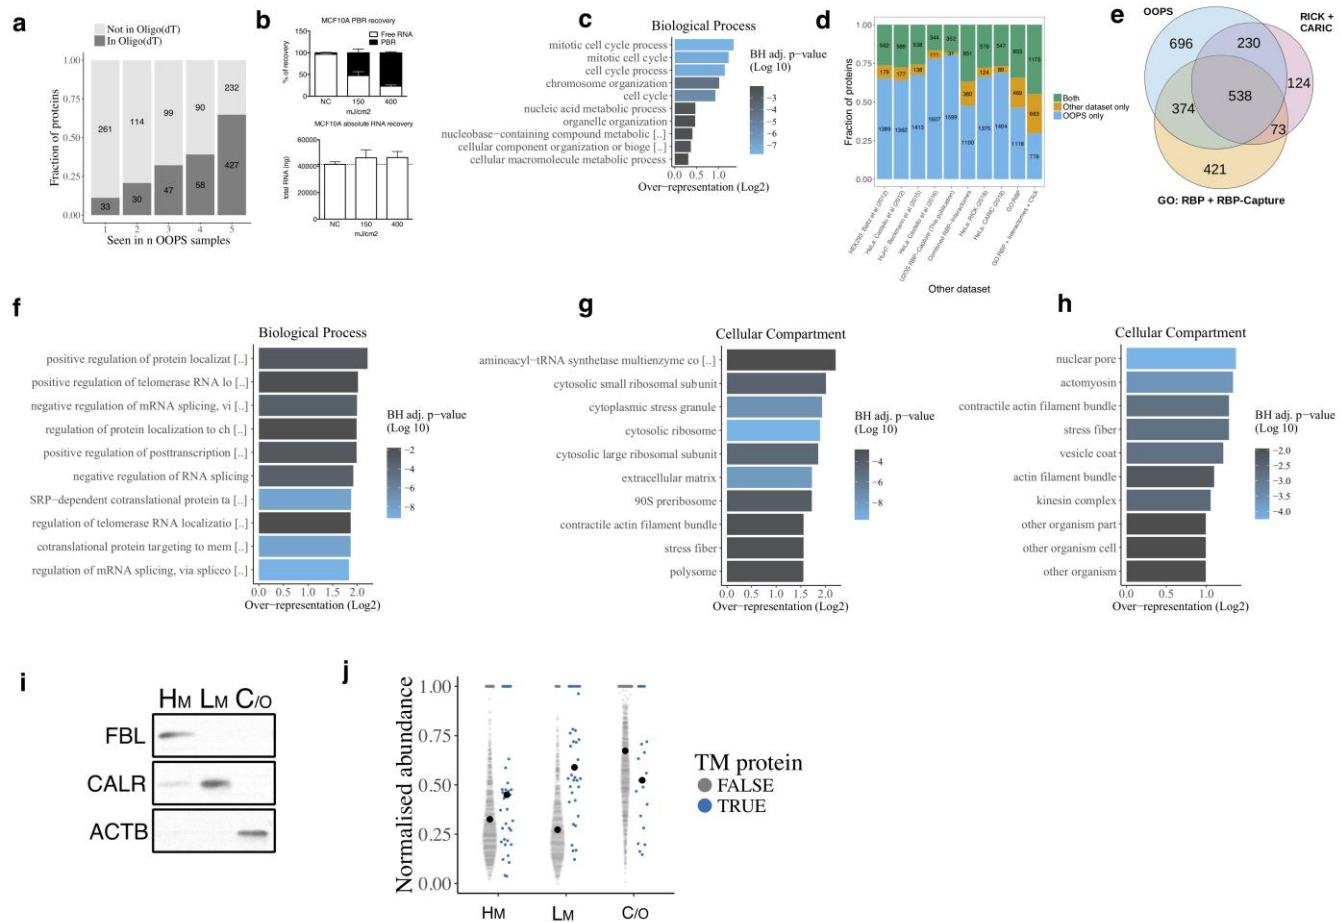

### Supplementary Figure 3

OOPS recovers known and new RBPs, even from under-represented cell compartments.

(a) Agreement between OOPS (n=5) and Oligo(dT) RBP-Capture in HEK 293 cells

(b) Crosslinking efficacy in MCF10A. Upper panel: Relative proportions of free RNA (aqueous phase) and protein-bound RNA (RBR; interface) with increasing UV dosage. Lower panel: Absolute quantification of the total recovered RNA (PBR + Free RNA). Data shown as mean +/- SD of 3 independent experiments

(c) Biological process GO terms over-represented in tumoral-cell specific RBPs

(d) Detailed agreement between OOPS and published human RBPomes

(e) Overlap between the union of OOPS proteins identified in the 3 cell lines, the union of RICK and CARIC studies, and GO annotated RBPs. Proteins were restricted to those expressed in at least one of the three OOPS cell lines

(f-g) Top 10 Biological processes and Cellular compartment GO terms over-represented in the proteins identified in U2OS, HEK293 or MCF10A OOPS

(h) Top 10 Cellular Compartments GO terms over-represented in OOPS-exclusive RBPome.

(i) Representative western blot of the cellular subfractionation. Analysed markers are: nuclear fibrillarlin (FBL), endoplasmic reticulum calreticulin (CALR), and cytosolic beta actin (ACTB), in heavy membranes (HM), light membranes (LM) and cytoskeleton and others (C/o) fractions.

(j) Normalised RBP abundance in the indicated fractions. Blue: transmembrane-containing RBPs. Grey: Non transmembrane-containing RBP.

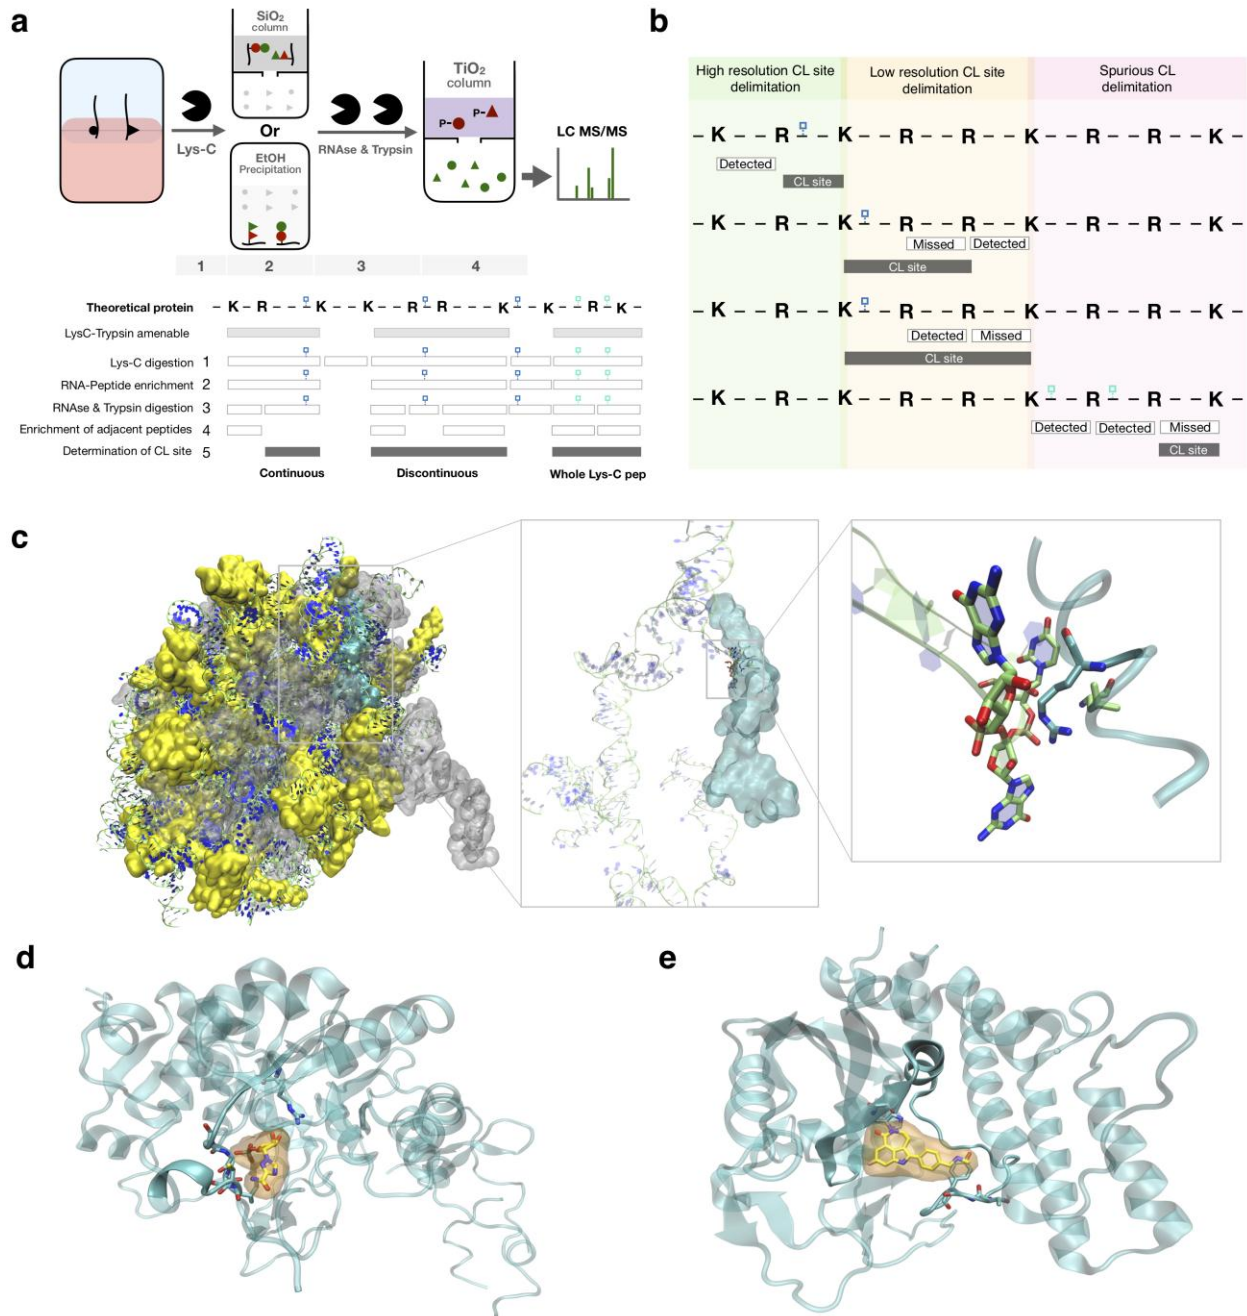

### Supplementary Figure 4

Direct assessment of cross-link sites validates most OOPS RBPs.

(a) Top: Schematic representation of the sequential digestion method used to identify the RNA-binding site. RNA-protein adducts are extracted from the interface and digested with Lys-C to yield RNA-peptides which are subsequently enriched by silica affinity column or ethanol precipitation. Enriched RNA-peptides are treated with RNAses followed by trypsin digestion. Peptides containing the UV-crosslinked nucleotide/RNA are retained by a TiO<sub>2</sub> affinity column and the unbound fraction containing the peptide sequences adjacent to RNA crosslinking site is analysed by LC-MS/MS. Red=peptides containing site of crosslinking. Green=peptides adjacent to the RNA-binding site peptide.

Bottom: Schematic representation of the process followed to determine crosslinking peptide. Blue squares represent a consistent

binding site. Turquoise squares represent a promiscuous binding site.

(b) Resolution and accuracy of RNA binding site detected is dependent on peptides detected.

(c) Cryo-EM structure of the ribosome quality control complex (PDB ID 3J92). Proteins are shown as grey transparent surface, while RNA is depicted as transparent lime ribbon. Proteins previously detected as RBPs are highlighted in yellow, while the newly detected protein is shown in cyan. Zoomed in structures show this new protein as transparent cyan cartoon with the interacting residue detected by direct evidence shown as cyan sticks and RNA residues at 4 Å or less from it shown as lime sticks.

(d-e) Crystal structures of (d) IMPDH2 in complex with ribavirin (PDB ID 1NF7) and (e) PARP1 in complex with rucaparib (PDB ID 1NF7). Proteins are shown as a cyan transparent cartoon and the protein region detected as RNA binding is shown in an opaque representation. Residues at 4 Å or less from inhibitor compounds (yellow sticks and surface representation) are shown as cyan sticks

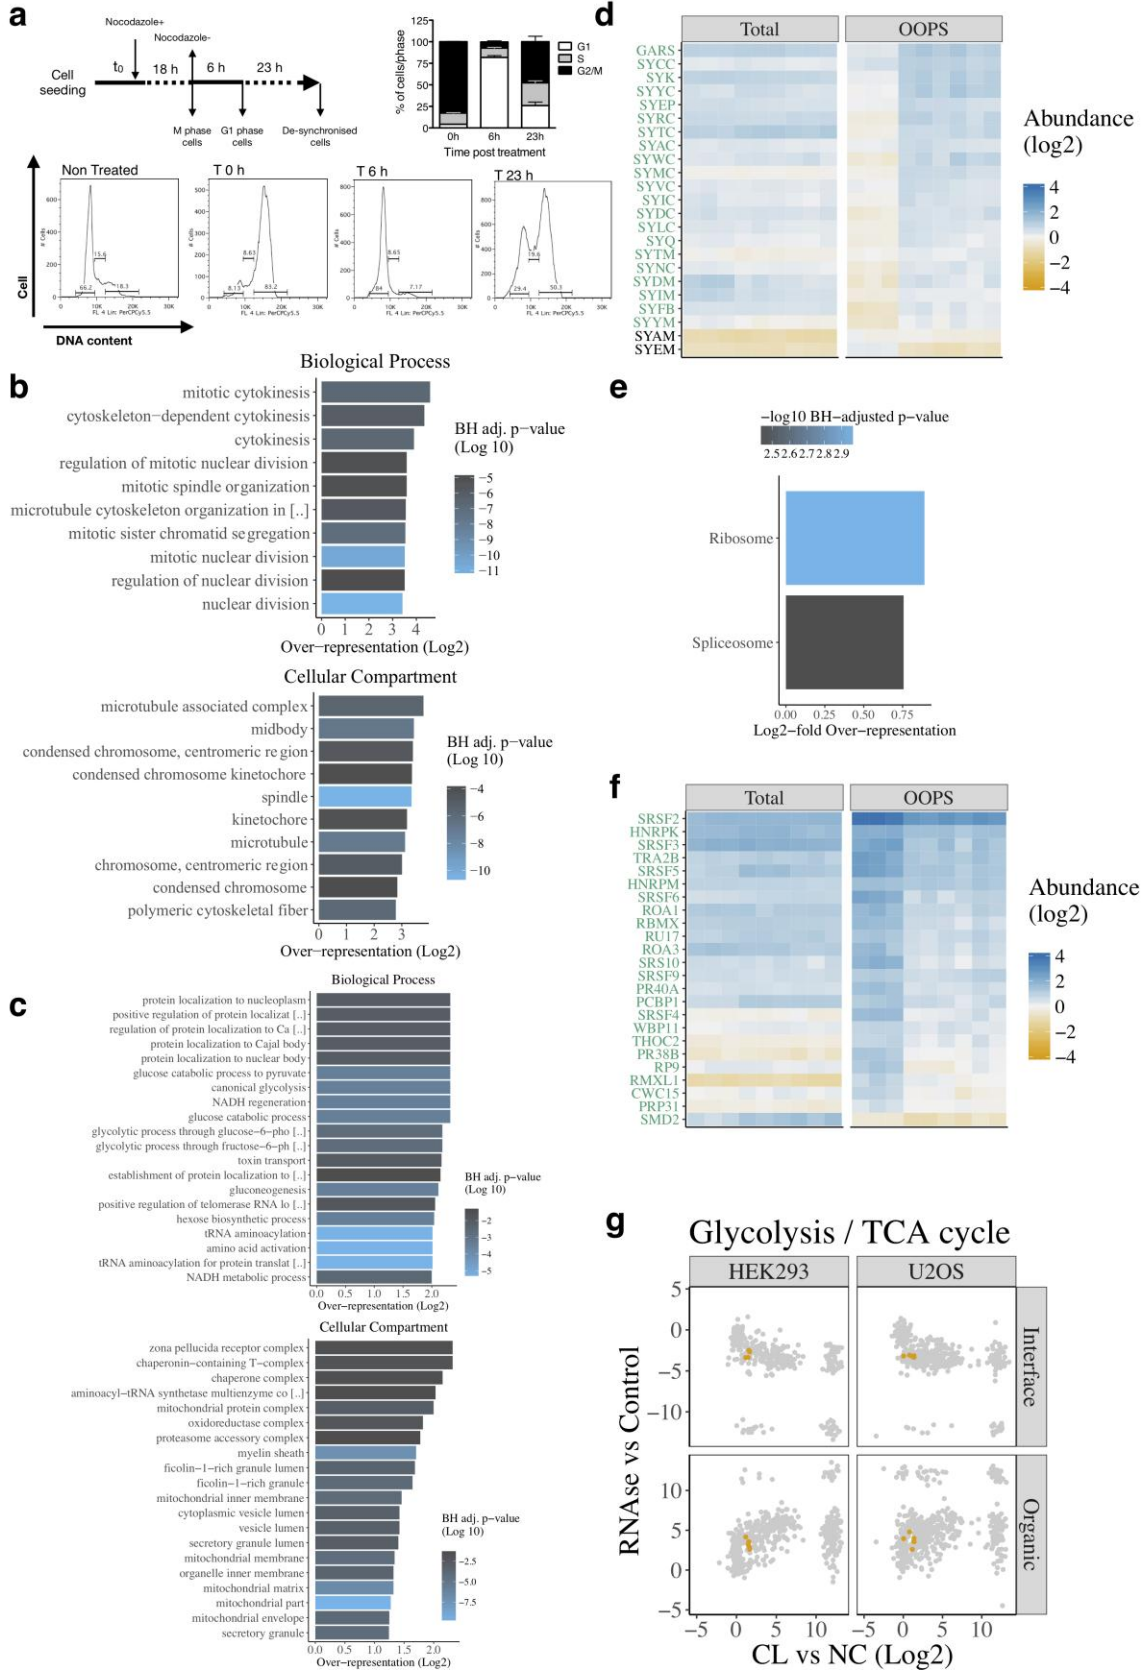



## Supplementary Figure 5

Characterization of the nocodazole arrest experiments.

- a) Top: Schematic representation of the nocodazole arrest/release experiment. Bottom-left: representative image of flow cytometry analysis of the cell-cycle stage by DNA content assessment. Bottom-right: Relative proportions of cells in G1, S and M phase for cells synchronised at each time-point is shown as the mean +/- SD of 3 independent experiments
- (b) Top 10 Biological Processes and Cellular Compartment GO terms over-represented in the total proteome of synchronised cells versus 6h post released cells
- (c) Top 20 Biological Processes and Cellular Compartment GO terms over-represented in the RBPs with a significant increase in RNA-binding post-release in the nocodazole experiment
- (d) Protein abundance for tRNA aminoacylation proteins with a significant increase in RNA-binding. Individual proteins with a significant increase are highlighted in green.
- (e) KEGG pathways over-represented in the RBPs with a significant decrease in RNA-binding post-release
- (f) Protein abundance for splicing proteins with a significant increase in RNA-binding at 0h
- (g) Crosslink vs control and RNase vs control protein abundance ratio in interface and organic phase for glycolytic and TCA cycle proteins (yellow)

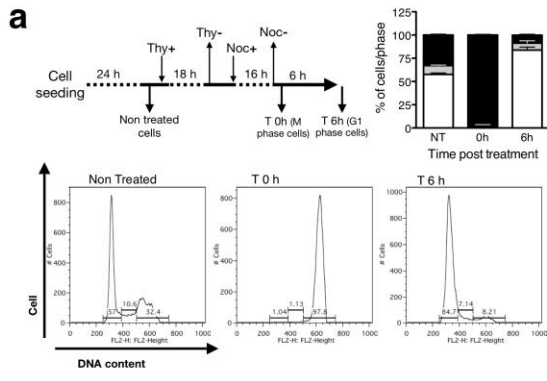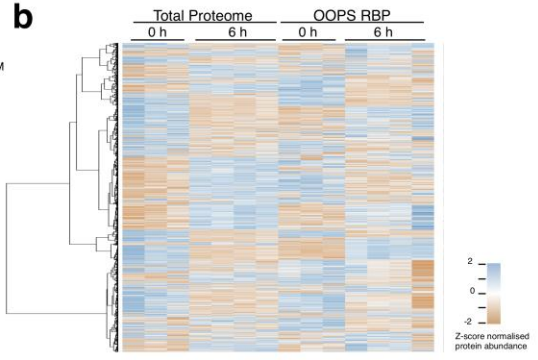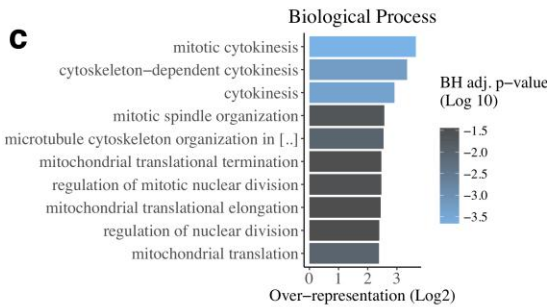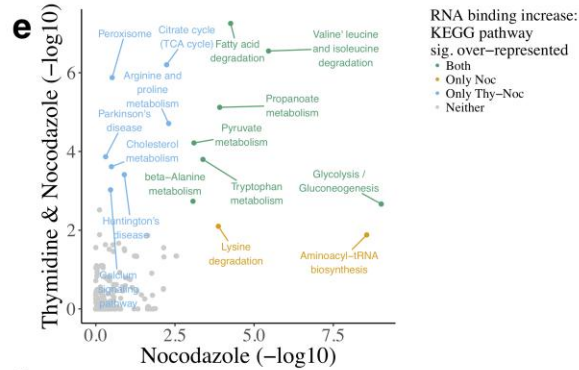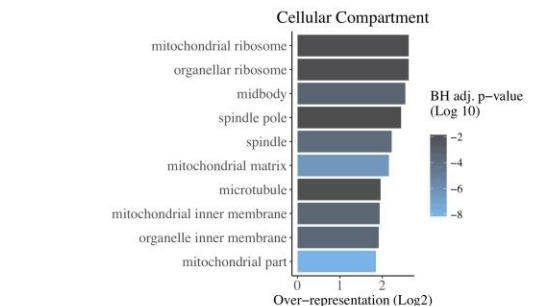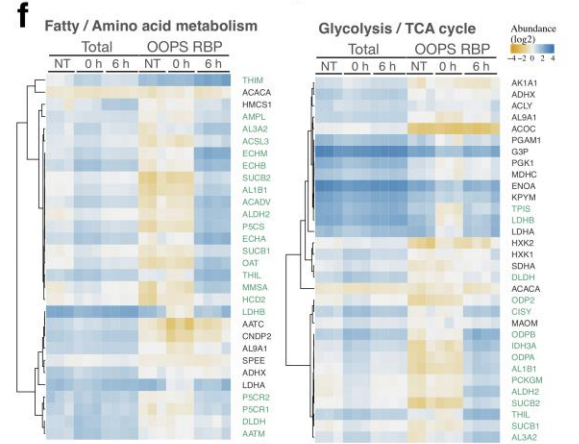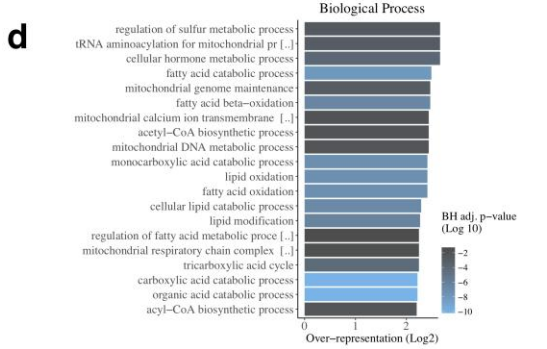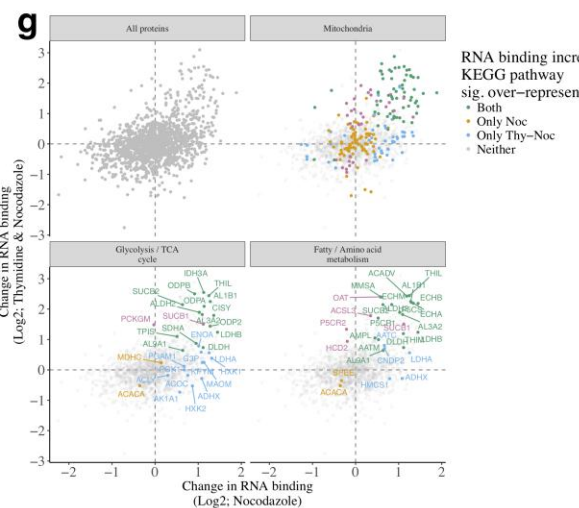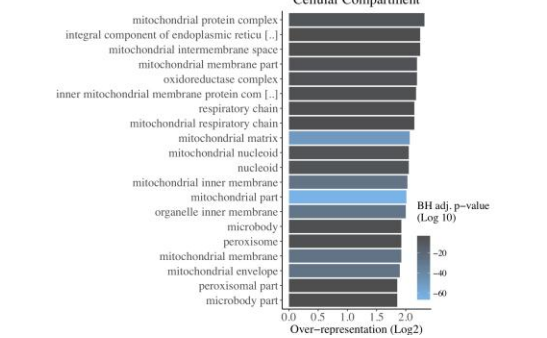

## Supplementary Figure 6

Characterization of the RBPome dynamics in the thymidine-nocodazole arrest experiments.

(a) Top-left: Schematic representation of the thymidine-nocodazole arrest/release experiment. Top-right: Relative proportions of cells in G1, S and G2/M phase for each time-point is shown as the mean  $\pm$  SD of 4 independent experiments Bottom: representative image of flow cytometry analysis of the cell-cycle stage by DNA content assessment.

(b) Protein abundance from total proteome and OOPS extractions in thymidine-nocodazole arrested and released cells. Abundance z score normalised within each extraction type. Proteins hierarchically clustered across all samples as shown on left

(c) Top 10 Biological process and Cellular Compartment GO terms over-represented in the total proteome of thymidine-nocodazole arrested cells versus non treated cells.

(d) Top 20 Biological process and Cellular Compartment GO terms over-represented in the RBPs with a significant increase in RNA-binding post-release in the thymidine-nocodazole experiment

(e) Correlation between p-values for KEGG pathway over-representation in the two nocodazole experiments.

(f) Protein abundance for groups of overlapping KEGG pathways over-represented in proteins with a significant increase in RNA-binding. Individual proteins with a significant increase are highlighted in green.

(g) Protein abundance for groups of overlapping KEGG pathways over-represented in proteins with a significant increase in RNA-binding. Individual proteins with a significant increase in RNA binding in 6 h vs 0 h are highlighted in green.

# 1 **Supplementary Note**

2

## 3 **Deduplication of SENSE total RNA-Seq**

4 The SENSE total RNA-Seq Library Prep kit (Lexogen) adds a non-template 2-9bp to  
5 the 5' end of the read sequence. The first 9bp of the read was therefore treated as a  
6 pseudo-unique molecular identifier (pUMI) for the purposes of de-duplication to help  
7 avoid over-deduplication. Error-aware read deduplication using pUMIs was  
8 performed with UMI-tools<sup>1</sup>.

9

## 10 **Identification of protein binding sites**

11 In order to identify regions of the transcriptome with decreased read coverage, a  
12 two-step process was performed. Firstly, for each gene in each pair of samples, the  
13 mean absolute difference in read coverage was calculated across all nucleotides. A  
14 Wilcoxon rank-sum test was applied to identify genes with a significant difference  
15 between intra-condition (NC and CL) and inter-condition comparisons (Benjamini-  
16 Hochberg<sup>2</sup> adjust p-value < 0.01). For these genes, 40 bp sliding windows (20 bp  
17 overlap) were tiled across the complete gene model (including introns) and the  
18 number of reads overlapping each window computed with *bedtools coverage*<sup>3</sup>.  
19 Windows with a significantly decreased coverage (putative protein binding site) in the  
20 four 400 mJ/cm<sup>2</sup> replicates vs four NC samples were identified using DESeq2<sup>4</sup>  
21 (Benjamini-Hochberg<sup>2</sup> adjusted p-value < 0.01). DESeq2 performs an initial filtering  
22 step to remove all input features (in this case windows) with insufficient read counts.

23

## 24 **Overlap with eCLIP data**

25 ENCODE eCLIP bed files<sup>5</sup> were downloaded from <https://www.encodeproject.org> on  
26 02/01/2018 and filtered according to the ENCODE stringent filter:  $-\log_{10}(\text{p-value}) \geq 5$   
27 and  $\log_2(\text{fold-enrichment}) \geq 3$ . For all windows retained for statistical testing by  
28 DESeq2, the number of U2OS OOPS RBPs with an eCLIP peak within the window  
29 was computed. A relationship was observed between the number of eCLIP peaks in  
30 a window and  $P(\text{putative binding site})$ . However, since read coverage was a potential  
31 confounding factor, we grouped windows based on the number of eCLIP peaks and  
32 for each group computed the null expectation for  $P(\text{putative binding site})$  by  
33 randomly selecting a set of windows with the same distribution of read coverage,  
34 with 100 iterations (denoted as random shuffle in Figure 1g). To identify the  
35 relationship between uracil content and  $P(\text{putative binding site})$ , we computed the  
36 number of uracils per window and separated windows based on whether they  
37 contained a UU dimer.

38

#### 39 **Antibodies:**

40 Anti-PTB (1:1000, homemade); anti-nucleolin (1:1000, Clone 4E2, GeneTex); anti-  
41 HuR (1:1000, Clone 3A2, Santa Cruz Biotechnology); anti-histone H3 (1:1000,  
42 Bethyl Laboratories,); anti- $\beta$ -tubulin (1:1000, Cell Signaling Technology). Anti-  
43 fibrillarin as nuclear marker (1:1000, clone C13C3, Cell Signaling, Leiden,  
44 Netherlands), anti-calreticulin as endoplasmic reticulum marker (1:1000, clone D3E6,  
45 Cell Signaling), and anti-beta actin as cytosolic marker (1:5000, ab8227, Abcam,  
46 Cambridge, UK).

47

#### 48 **Uncropped western blot scans:**

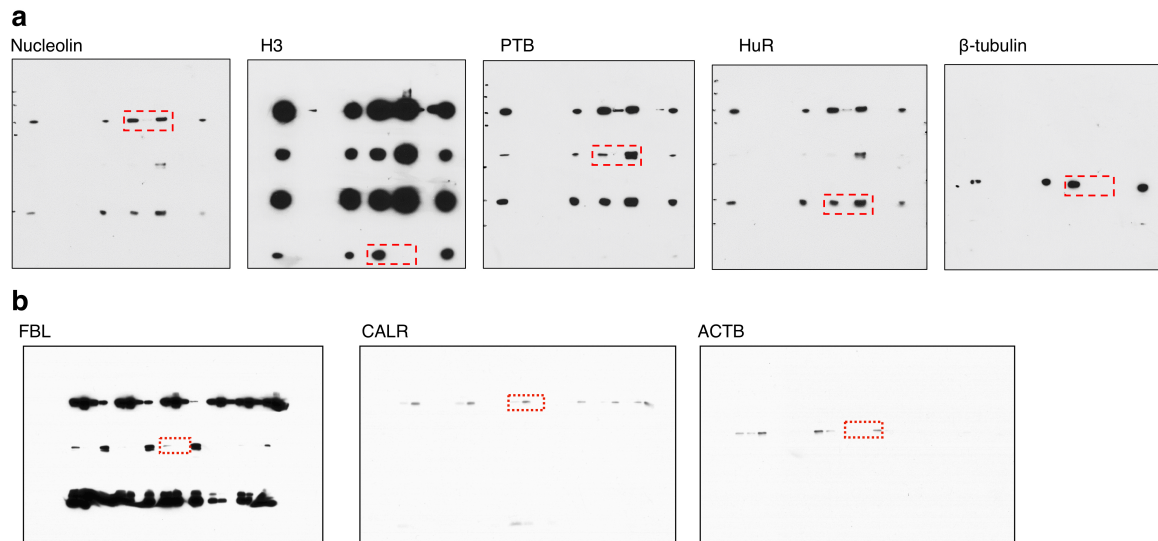

49

50 (a) Uncropped scans of western blots presented in the Supplementary Figure S2f.

51 (b) Uncropped scans of western blots presented in the Supplementary Figure S3i.

52

### 53 **SILAC labelling rationale**

54 U-2 OS osteosarcoma cells were cultured in commercially available DMEM media

55 for SILAC labeling (Thermo Fisher Scientific). We cultured the cells for two weeks

56 (four passages) and optimal labelling confirmed from test samples obtained in

57 parallel to the samples used in this study. Four biological replicates were performed

58 in all our SILAC experiments, with the labels switched such that the treatment

59 condition was the heavy isotope in replicates 1 & 2 and the light isotopes in

60 replicates 3 & 4. For MS analysis of SILAC labelled samples, the CHOPIN

61 acquisition method was used in order to allow the use of both detectors in the

62 Orbitrap Lumos on predefined precursor types that optimizes parallel ion processing,

63 thus ensuring higher yield. Despite having the possibility to trigger the MS<sup>2</sup>

64 fragmentation in only peptides present in SILAC pairs, we reasoned that many

65 peptides are likely to be observed with no signal in the control condition, which was

66 indeed confirmed.

67

68 **LC-MS/MS technical details**

69 Supplementary table 6 summarises the main MS parameters in each experiment set  
70 and the TMT tags for each sample in the nocodazole experiments.

71

72 Samples from RBP-capture and subcellular fractionation were analysed in an  
73 Orbitrap nano-ESI Q-Exactive mass spectrometer (Thermo Fisher Scientific),  
74 coupled to a nanoLC (Dionex Ultimate 3000 UHPLC). Samples were trapped on a  
75 100  $\mu\text{m}$   $\times$  2 cm, C18, 5  $\mu\text{m}$ , 100 trapping column (Acclaim PepMap 100) in  $\mu\text{L}$ -pickup  
76 injection mode at 15  $\mu\text{L}/\text{min}$  flow rate for 10 minutes. Samples were then loaded on a  
77 Rapid Separation Liquid Chromatography, 75  $\mu\text{m}$   $\times$  50 cm nanoViper C18 3  $\mu\text{m}$  100  
78 column (Acclaim, PepMap) at 50  $^{\circ}\text{C}$  retrofitted to an EASY-Spray source with a flow  
79 rate of 300 nL/min (buffer A, HPLC H<sub>2</sub>O, 0.1% formic acid; buffer B, 100% ACN,  
80 0.1% formic acid; 0–15 min: at 4% buffer B, 15–90 min: linear gradient 4% to 40%  
81 buffer B, 90-90.3 min: 40% to 90% buffer B, 90.3-95 min: at 90% buffer B, 95-95.3  
82 min: 90% to 4% buffer B, 95.3-120 min: at 4% buffer B). Mass spectra were acquired  
83 in positive ion mode applying data-dependent automatic survey MS scan and  
84 tandem mass spectra (MS/MS) acquisition modes. Each MS scan in the Orbitrap  
85 analyser (mass range =  $m/z$  380 –1500, resolution = 35,000) was followed by  
86 MS/MS of the 20 most intense peptides. Fragmentation was performed by high-  
87 energy collision-activated dissociation (NCE = 25; resolution = 17,500), and selected  
88 fragmented ions were dynamically excluded for 20 s.

89

90 SILAC and unlabeled samples generated from OOPS experiments in *E. coli* and  
91 MCF10A were analysed in the Orbitrap Fusion Lumos (Thermo Fisher Scientific)

92 coupled to a nanoLC Dionex Ultimate 3000 UHPLC (Thermo Fisher Scientific) with  
93 the same columns, temperature and flow rates as above. Analytical chromatography  
94 was performed over 120 min (buffer A, HPLC H<sub>2</sub>O, 0.1% formic acid; buffer B, 100%  
95 ACN, 0.1% formic acid; 0–15 min: at 2% buffer B, 15–100 min: linear gradient 2% to  
96 40% buffer B, 100-100.3 min: 40% to 90% buffer B, 100.3-110 min: at 90% buffer B,  
97 110-110.3 min: 90% to 2% buffer B, 100.3-120 min: at 2% buffer B). Mass spectra  
98 were acquired using CHarge Ordered Parallel Ion aNalysis (CHOPIN) acquisition in  
99 positive ion mode as previously reported<sup>6</sup>. MS scans were acquired at a resolution of  
100 120,000 between 400 and 1500 m/z and an AGC target of  $4 \times 10^5$ . MS/MS spectra  
101 were acquired in the linear ion trap (rapid scan mode) after collision-induced  
102 dissociation (CID) fragmentation at a collision energy of 35% and an AGC target of  $4$   
103  $\times 10^3$  for up to 250 ms, employing a maximal duty cycle of 3 s, prioritizing the most  
104 intense ions and injecting ions for all available parallelizable time. Selected precursor  
105 masses were excluded for 60 s. For precursor selection, we prioritized the least  
106 abundant signals. Doubly charged ions were scheduled for CID/ion trap analysis with  
107 the same parameters applied as above. Charge states 3–7 with precursor intensity  
108 >500 000, however, were scheduled for analysis by a fast HCD/Orbitrap scan of  
109 maximal 40 ms (17,500 resolution). The remaining charge-state 3–7 ions with  
110 intensity <500 000 were scheduled for analysis by CID/ion trap, as described above.

111

112 Samples for assessment of RNA crosslinking site were acquired in the Orbitrap  
113 Fusion Lumos with the same configurations and chromatography setup as above,  
114 but with 60 min of analytical chromatography (buffer A, HPLC H<sub>2</sub>O, 0.1% formic  
115 acid; buffer B, 100% ACN, 0.1% formic acid; 0–3 min: at 2% buffer B, 3–30 min:  
116 linear gradient 2% to 40% buffer B, 30-30.3 min: 40% to 90% buffer B, 30.3-35 min:



117 at 90% buffer B, 35-35.3 min: 90% to 2% buffer B, 35.3-60 min: at 2% buffer B). MS  
118 scans were acquired at a resolution of 120,000 between 380 and 1500 m/z and an  
119 AGC target of  $4 \times 10^5$ . MS/MS spectra were acquired using HCD and Orbitrap  
120 analyser with collision energy of 38%, AGC target of  $5 \times 10^4$  for up to 86 ms (50,000  
121 resolution), dynamic exclusion of 70 s and employing a maximal duty cycle of 3 s.  
122

123 TMT-labelled fractions were analysed in an Orbitrap Fusion Lumos with the same  
124 configurations and chromatography setup as above, but with 240 min of analytical  
125 chromatography (buffer A, HPLC H<sub>2</sub>O, 0.1% formic acid; buffer B, 100% ACN, 0.1%  
126 formic acid; 0–15 min: at 2% buffer B, 15–215 min: linear gradient 2% to 40% buffer  
127 B, 215-215.3 min: 40% to 90% buffer B, 215.3-225 min: at 90% buffer B, 225-225.3  
128 min: 90% to 2% buffer B, 225.3-240 min: at 2% buffer B). Mass spectra were  
129 acquired in positive ion mode applying data acquisition using synchronous precursor  
130 selection MS3 (SPS-MS3) acquisition mode<sup>7</sup>. Each MS scan in the Orbitrap analyzer  
131 (mass range = m/z 400 –1500, resolution = 120,000). The most intense ions over a  
132 threshold of  $5 \times 10^4$  were selected for collision induced dissociation (CID)-MS2  
133 fragmentation, with an AGC target and maximum accumulation time of  $1 \times 10^4$  and  
134 60 ms. Mass filtering was performed by the quadrupole with 0.7 m/z transmission  
135 window, followed by CID fragmentation in the linear ion trap with 35% normalized  
136 collision energy. SPS was applied to co-select 10 fragment ions for HCD-MS3  
137 analysis. SPS ions were all selected within the 400–1,200 m/z range and were set to  
138 preclude selection of the precursor ion and TMT ion series. AGC targets and  
139 maximum accumulation times were set to  $5 \times 10^4$  and 86 ms. Co-selected precursors  
140 for SPS-MS3 underwent HCD fragmentation with 65% normalized collision energy  
141 and were analysed in the Orbitrap with nominal resolution of 50,000. The number of

142 SPS-MS3 spectra acquired between full scans was restricted to a duty cycle of 3 s.  
143 Selected fragmented ions were dynamically excluded for 60 s.  
144 TMT reporter values were assessed through Proteome Discoverer using *Most Confident*  
145 *Centroid* method for peak integration and integration tolerance of 20 ppm (0.0024 Da).  
146 Reporter ion intensities were adjusted to correct for the isotopic impurities of the different  
147 TMT reagents (following manufacturer specifications). Sample labels for each TMT tag are  
148 presented in supplementary table 6.

149

### 150 **Peptide to protein assignment**

151 Peptide to protein assignment was performed using an approximate minimum  
152 parsimonious approach. Swiss-Prot proteins identified (including non Master-  
153 proteins) were first ranked by their number of peptides identified. The peptides from  
154 the top ranked proteins deemed to be assigned to this protein and removed from all  
155 remaining proteins. The remaining proteins were then re-ranked based on the  
156 updated peptide assignments. This was repeated until all peptides were accounted,  
157 with ties settled by assigning the peptide to multiple proteins. Peptides which did not  
158 receive a unique master protein identification were discarded.

159

### 160 **Identification of RNA binding sites**

161 Putative RNA binding sites were identified using the trypsin peptides detected  
162 (Figure S4a). To work back from the detected peptides to the sites of RNA  
163 crosslinking, a catalog of theoretical peptides was generated by *in-silico* protein  
164 digestion using Lys-C and trypsin. Peptides less than 7 or greater than 36 amino  
165 acids were discarded (these thresholds were derived from the 1<sup>st</sup> and 99<sup>th</sup> percentile

166 for the size of trypsin peptides detected in the other MS experiments). Lys-C  
167 peptides which did not yield at least two trypsin peptides were discarded since  
168 identification of RNA binding sites is dependent on detection of the adjacent peptides  
169 without RNA crosslinking but from the same Lys-C peptide. Detected peptides were  
170 then matched to this *in-silico* generated catalogue. Peptides observed in all 3 ethanol  
171 replicates, or at least 1 silica replicate were retained. The putative site of RNA  
172 crosslinking was then identified as the portion of the Lys-C peptide which was not  
173 covered by an identified trypsin peptide. Where this region was discontinuous, e.g  
174 only the middle portion of a Lys-C peptides was covered by a detected trypsin  
175 peptides, the binding site was identified as the region from the first amino acid which  
176 was not covered by a trypsin peptide to the last non-covered amino acid, including all  
177 amino acids in between (Figure S4a). Where all Lys-C peptides amino acids were  
178 covered, the entire peptide was considered a putative RNA binding site. Putative  
179 binding sites > 30 amino acids were discarded from downstream analyses.

180

## 181 **Supplementary references**

- 182 1. Smith, T., Heger, A. & Sudbery, I. UMI-tools: modeling sequencing errors in  
183 Unique Molecular Identifiers to improve quantification accuracy. *Genome Res.*  
184 **27**, 491–499 (2017).
- 185 2. Benjamini, Y. & Hochberg, Y. Controlling the False Discovery Rate : A  
186 Practical and Powerful Approach to Multiple Testing Author ( s ): Yoav  
187 Benjamini and Yosef Hochberg Source : Journal of the Royal Statistical  
188 Society . Series B ( Methodological ), Vol . 57 , No . 1 Published by : *J. R. Stat.*  
189 *Soc. Ser. B* **57**, 289–300 (1995).
- 190 3. Quinlan, A. R. & Hall, I. M. BEDTools: a flexible suite of utilities for comparing  
191 genomic features. *Bioinformatics* **26**, 841–2 (2010).
- 192 4. Love, M. I., Huber, W. & Anders, S. Moderated estimation of fold change and  
193 dispersion for RNA-seq data with DESeq2. *Genome Biol.* **15**, 550 (2014).
- 194 5. Van Nostrand, E. L. *et al.* A Large-Scale Binding and Functional Map of  
195 Human RNA Binding Proteins. *bioRxiv* (2017).
- 196 6. Davis, S. *et al.* Expanding Proteome Coverage with CHarge Ordered Parallel  
197 Ion aNalysis (CHOPIN) Combined with Broad Specificity Proteolysis. *J.*  
198 *Proteome Res.* **16**, 1288–1299 (2017).
- 199 7. McAlister, G. C. *et al.* MultiNotch MS3 enables accurate, sensitive, and  
200 multiplexed detection of differential expression across cancer cell line  
201 proteomes. *Anal. Chem.* **86**, 7150–7158 (2014).

202
